# Supplementary figures and images for: Smoking Cessation Care in State-Operated or State-Supported Psychiatric Hospitals: From Policy to Practice
Source: Atypon-hosted journal article supplement (doi:10.1176/appi.ps.201200290), 2013-04-01

**Figure 1. Participating state-operated or supported psychiatric inpatient hospitals (n=108)**

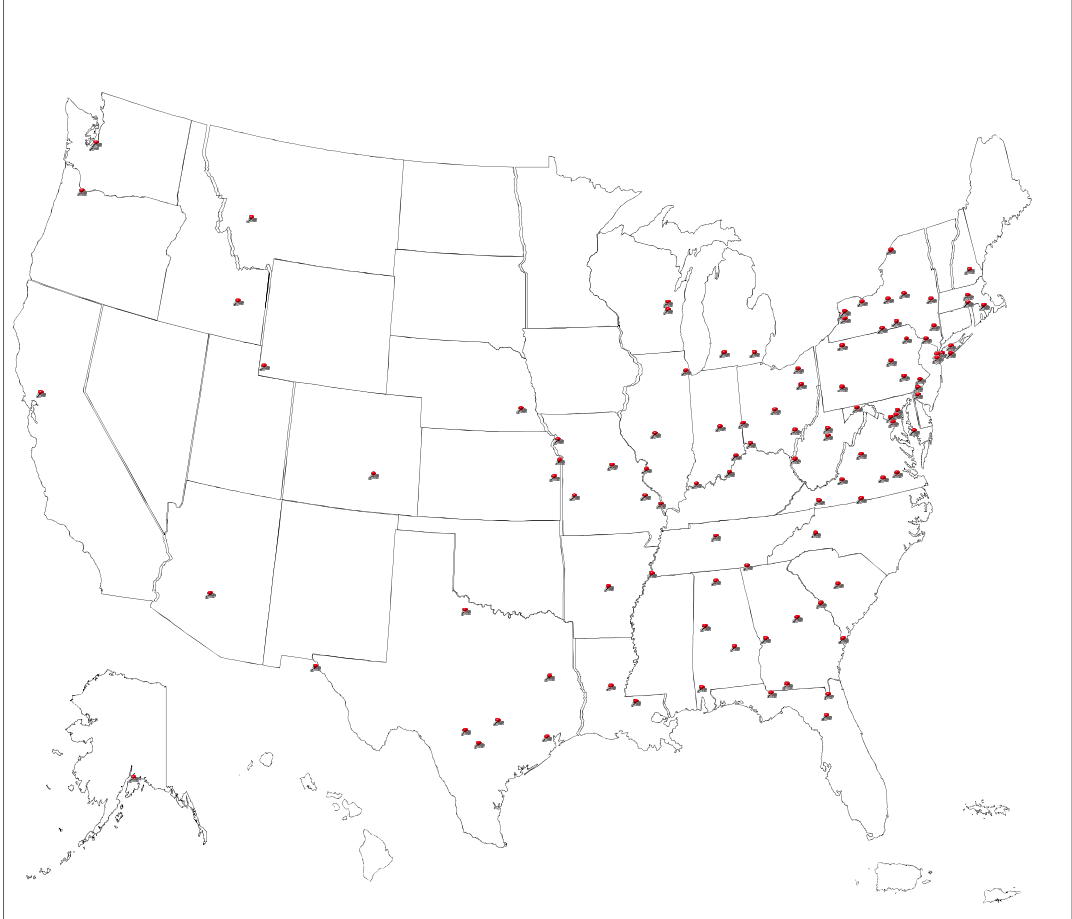

Supplement: 666_ds001.pdf [file 666_ds001.pdf]
